# Supplementary material
Source: Springer Nature journal article supplement (https://www.springermedizin.de/resource/supplementary/12958_2012_1023_MOESM4_ESM.pdf/9566624)

**A.**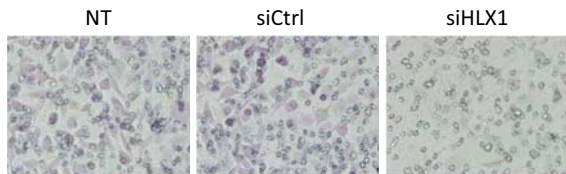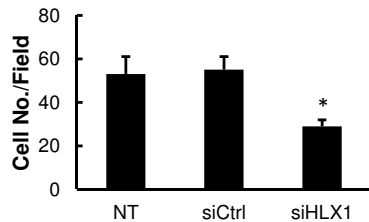**B.**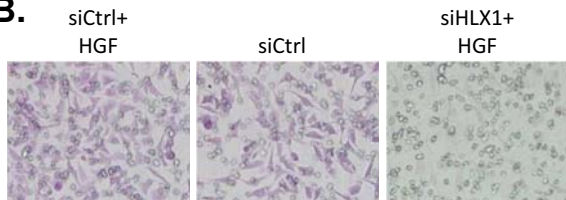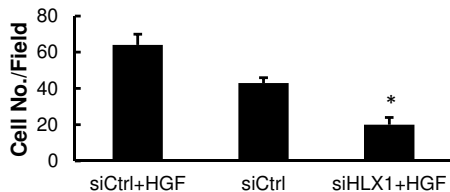**C.**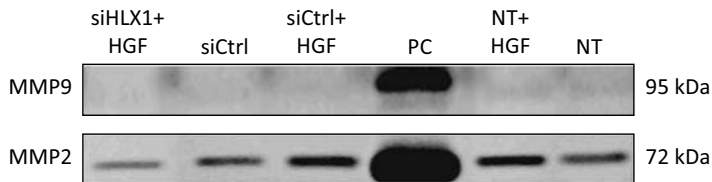

Supplement: MOESM4 [file 9566624]
